# Supplementary material for: Mapping the road to elimination: a 5-year evaluation of implementation strategies associated with hepatitis C treatment in the veterans health administration
Source: PubMed Central journal article supplement (PMC8684191; doi:10.1186/s12913-021-07312-4), 2021-12-18
Supplement: 12913_2021_7312_MOESM1_ESM.pdf [file 12913_2021_7312_MOESM1_ESM.pdf]

1 **Appendix 1. Strategy Use and Association with HCV Treatment Over Time**

| Cluster and Strategy                                                                                           | FY15 | FY16  | FY17  | FY18 | FY19 | Most Popular | Timing | Dose | Diffusion | Core Strategy |
|----------------------------------------------------------------------------------------------------------------|------|-------|-------|------|------|--------------|--------|------|-----------|---------------|
|                                                                                                                | n=80 | n=105 | n=109 | n=88 | n=58 | P            | Δ      | E    | D         | H,L           |
| <b>Infrastructure</b>                                                                                          |      |       |       |      |      |              |        |      |           |               |
| • Change physical structure and equipment                                                                      | 53%  | 51%   | 54%   | 57%  | 29%  | P            |        |      | D         | L             |
| • Change the record systems                                                                                    | 71%  | 57%   | 52%   | 40%  | 31%  | P            | Δ      |      |           | H             |
| • Change the location of clinical service sites                                                                | 26%  | 37%   | 39%   | 34%  | 14%  |              |        |      |           |               |
| • Develop a separate organization or group responsible for disseminating HCV care                              | 23%  | 33%   | 19%   | 13%  | 7%   |              | Δ      |      |           |               |
| • Mandate changes to HCV care                                                                                  | 55%  | 52%   | 35%   | 27%  | 22%  |              | Δ      |      | D         |               |
| • Create or change credentialing and/or licensure standards                                                    | 29%  | 30%   | 17%   | 16%  | 17%  |              | Δ      |      |           |               |
| • Participate in liability reform efforts that make clinicians more willing to deliver the clinical innovation | 4%   | 11%   | 10%   | 8%   | 5%   |              |        |      |           |               |
| • Change accreditation or membership requirements                                                              | 4%   | 1%    | 2%    | 0%   | 0%   |              |        |      |           |               |
| <b>Financial</b>                                                                                               |      |       |       |      |      |              |        |      |           |               |
| • Access new funding                                                                                           | 30%  | 41%   | 41%   | 47%  | 21%  |              |        |      |           | H             |
| • Alter incentive/allowance structures                                                                         | 5%   | 10%   | 9%    | 5%   | 5%   |              |        |      | D         | L             |
| • Provide financial disincentives for failure to implement or use the clinical innovations                     | 0%   | 2%    | 0%    | 1%   | 2%   |              |        |      |           |               |
| • Respond to proposals to deliver HCV care                                                                     | 44%  | 51%   | 34%   | 34%  | 17%  |              | Δ      |      |           |               |
| • Change billing                                                                                               | 11%  | 14%   | 10%   | 5%   | 5%   |              |        |      |           |               |
| • Place HCV medications on the formulary                                                                       | 70%  | 69%   | 61%   | 45%  | 28%  | P            | Δ      |      | D         |               |
| • Alter patient fees                                                                                           | 0%   | 0%    | 0%    | 0%   | 0%   |              |        |      |           |               |

|                                                                                                     |            |            |            |            |            |   |   |  |   |       |
|-----------------------------------------------------------------------------------------------------|------------|------------|------------|------------|------------|---|---|--|---|-------|
| • Use capitated payments                                                                            | 0%         | 1%         | 1%         | 0%         | 0%         |   |   |  |   |       |
| • Use other payment schemes                                                                         | <b>5%</b>  | 2%         | 4%         | 0%         | 0%         |   |   |  | E |       |
| <b>Support clinicians</b>                                                                           |            |            |            |            |            |   |   |  |   |       |
| • Create new clinical teams                                                                         | <b>46%</b> | <b>50%</b> | 39%        | 36%        | 21%        |   |   |  | E | D L   |
| • Facilitate the relay of clinical data to providers                                                | <b>56%</b> | <b>68%</b> | 70%        | 56%        | 41%        | P |   |  |   |       |
| • Revise professional roles                                                                         | <b>50%</b> | <b>55%</b> | 39%        | 27%        | 29%        |   | Δ |  |   | D L   |
| • Develop reminder systems for clinicians                                                           | 34%        | 44%        | 34%        | 43%        | 29%        |   |   |  |   | D     |
| • Develop resource sharing agreements                                                               | <b>26%</b> | 35%        | 28%        | 25%        | 21%        |   |   |  |   | H     |
| <b>Provide interactive assistance</b>                                                               |            |            |            |            |            |   |   |  |   |       |
| • Use outside assistance often called “facilitation”                                                | 8%         | 12%        | 24%        | 20%        | 12%        |   | Δ |  |   |       |
| • Provide technical assistance                                                                      | <b>15%</b> | 25%        | 25%        | <b>19%</b> | 12%        |   |   |  |   | D L   |
| • Provide clinical supervision                                                                      | <b>44%</b> | <b>48%</b> | 35%        | 32%        | 28%        |   |   |  |   | D L   |
| • Use a centralized system to deliver facilitation                                                  | <b>28%</b> | 28%        | 25%        | <b>24%</b> | 24%        |   |   |  | E | H     |
| <b>Adapt and tailor to the context</b>                                                              |            |            |            |            |            |   |   |  |   |       |
| • Use data experts to manage HCV data                                                               | <b>58%</b> | <b>70%</b> | 69%        | <b>44%</b> | 47%        | P | Δ |  | E | H     |
| • Use data warehousing techniques                                                                   | <b>85%</b> | 91%        | 92%        | 86%        | <b>81%</b> | P |   |  |   | D L   |
| • Tailor strategies to deliver HCV care                                                             | <b>63%</b> | 81%        | 73%        | 70%        | 69%        | P | Δ |  |   | D H,L |
| • Promote adaptability                                                                              | <b>55%</b> | 75%        | 70%        | 61%        | 52%        | P | Δ |  |   | H     |
| <b>Train and educate stakeholders</b>                                                               |            |            |            |            |            |   |   |  |   |       |
| • Conduct educational meetings                                                                      | <b>51%</b> | 64%        | 68%        | 53%        | <b>41%</b> | P |   |  |   |       |
| • Have an expert in HCV care meet with providers to educate them                                    | <b>41%</b> | 53%        | 51%        | 48%        | 33%        |   |   |  |   |       |
| • Provide ongoing HCV training                                                                      | <b>49%</b> | 60%        | 54%        | <b>44%</b> | 34%        |   |   |  | E |       |
| • Facilitate the formation of groups of providers and fostered a collaborative learning environment | <b>44%</b> | <b>43%</b> | <b>38%</b> | 31%        | 26%        |   |   |  |   |       |
| • Developed formal educational materials                                                            | 39%        | 35%        | 39%        | 30%        | 12%        |   |   |  |   |       |

|                                                                                                               |            |            |            |            |     |   |   |   |   |
|---------------------------------------------------------------------------------------------------------------|------------|------------|------------|------------|-----|---|---|---|---|
| • Distribute educational materials                                                                            | 55%        | <b>55%</b> | 58%        | 52%        | 33% |   |   |   |   |
| • Provide ongoing consultation with one or more HCV treatment experts                                         | 58%        | 71%        | 59%        | 56%        | 55% | P |   |   |   |
| • Train designated clinicians to train others                                                                 | 20%        | 26%        | 26%        | 20%        | 17% |   |   | D |   |
| • Vary the information delivery methods to cater to different learning styles when presenting new information | <b>36%</b> | 36%        | 31%        | 32%        | 26% |   |   |   |   |
| • Give providers opportunities to shadow other experts in HCV                                                 | 33%        | 22%        | <b>20%</b> | <b>23%</b> | 19% |   |   |   |   |
| • Use educational institutions to train clinicians                                                            | <b>11%</b> | <b>15%</b> | 12%        | 19%        | 14% |   |   | E |   |
| <b><i>Develop stakeholder interrelationships</i></b>                                                          |            |            |            |            |     |   |   |   |   |
| • Build a local coalition/team to address challenges                                                          | <b>53%</b> | <b>53%</b> | <b>38%</b> | 27%        | 26% | Δ |   | D | L |
| • Conduct local consensus discussions                                                                         | <b>48%</b> | <b>54%</b> | <b>50%</b> | 32%        | 22% | Δ |   |   |   |
| • Obtain formal written commitments from key partners that state what they will do to implement HCV care      | 4%         | 4%         | 6%         | 7%         | 0%  |   |   | E |   |
| • Recruit, designate, and/or train leaders                                                                    | <b>26%</b> | <b>23%</b> | 18%        | 14%        | 10% |   |   |   |   |
| • Inform local opinion leaders about advances in HCV care                                                     | <b>49%</b> | 46%        | <b>40%</b> | <b>32%</b> | 29% |   |   | E |   |
| • Share the knowledge gained from quality improvement efforts with other sites outside your medical center    | <b>38%</b> | 57%        | <b>54%</b> | 36%        | 31% | Δ | E |   | H |
| • Identify and prepare champions                                                                              | <b>50%</b> | 52%        | <b>50%</b> | 40%        | 38% |   |   | D | L |
| • Organize support teams of clinicians, give them time to share the lessons learned and support               | 26%        | <b>32%</b> | 32%        | <b>18%</b> | 17% |   |   |   |   |

|                                                                                                                        |            |            |            |            |     |   |     |
|------------------------------------------------------------------------------------------------------------------------|------------|------------|------------|------------|-----|---|-----|
| one another's learning                                                                                                 |            |            |            |            |     |   |     |
| • Use advisory boards and interdisciplinary workgroups to provide input into HCV policies and elicit recommendations   | 26%        | 22%        | 21%        | 14%        | 10% |   |     |
| • Seek the guidance of experts in implementation                                                                       | 44%        | 50%        | 44%        | 35%        | 33% |   |     |
| • Build on existing high-quality working relationships and networks to promote information sharing and problem solving | <b>61%</b> | 71%        | 62%        | 58%        | 47% | P |     |
| • Use modeling or simulated change                                                                                     | <b>13%</b> | <b>15%</b> | 11%        | 10%        | 5%  |   |     |
| • Partner with a university to share ideas                                                                             | <b>14%</b> | 11%        | 13%        | 17%        | 7%  |   | E   |
| • Make efforts to identify early adopters to learn from their experiences                                              | <b>16%</b> | <b>24%</b> | <b>21%</b> | <b>15%</b> | 12% |   | E   |
| • Visit other sites outside your medical center to try to learn from their experiences                                 | <b>15%</b> | 20%        | 18%        | 18%        | 16% |   |     |
| • Develop an implementation glossary                                                                                   | 3%         | 6%         | 6%         | 5%         | 2%  |   |     |
| • Involve executive boards                                                                                             | 23%        | <b>33%</b> | 29%        | 17%        | 14% |   |     |
| <b><i>Use evaluative and iterative strategies</i></b>                                                                  |            |            |            |            |     |   |     |
| • Assess for readiness and identify barriers and facilitators to change                                                | 26%        | <b>30%</b> | 26%        | 22%        | 17% |   |     |
| • Conduct a local needs assessment                                                                                     | 45%        | 43%        | 39%        | 24%        | 24% | Δ | H   |
| • Develop a formal implementation blueprint                                                                            | 34%        | <b>36%</b> | 29%        | 22%        | 14% |   | H   |
| • Start with small pilot studies and then scale them up                                                                | 23%        | 25%        | 23%        | 17%        | 10% |   | D H |
| • Collect and summarize clinical performance data and give it to clinicians and                                        | <b>21%</b> | <b>26%</b> | 30%        | 19%        | 19% |   |     |

administrators to implement changes in a cyclical fashion using small tests of change before making system-wide changes

|                                                                                                                                     |            |            |            |            |     |  |   |   |   |   |
|-------------------------------------------------------------------------------------------------------------------------------------|------------|------------|------------|------------|-----|--|---|---|---|---|
| • Conduct small tests of change, measured outcomes, and then refine these tests                                                     | 19%        | <b>21%</b> | <b>27%</b> | 18%        | 10% |  |   |   | D | L |
| • Develop and use tools for quality monitoring                                                                                      | 41%        | 32%        | 28%        | 22%        | 16% |  | Δ |   | D |   |
| • Develop and organize systems that monitor clinical processes and/or outcomes for the purpose of quality assurance and improvement | 30%        | <b>28%</b> | 24%        | 13%        | 12% |  | Δ |   |   |   |
| • Intentionally examine the efforts to promote HCV care                                                                             | 61%        | <b>69%</b> | 61%        | 52%        | 43% |  |   |   | P |   |
| • Develop strategies to obtain and use patient and family feedback                                                                  | 20%        | <b>20%</b> | 11%        | 13%        | 10% |  |   |   |   |   |
| <b>Engage consumers</b>                                                                                                             |            |            |            |            |     |  |   |   |   |   |
| • Involve patients/consumers and family members                                                                                     | 50%        | 61%        | 50%        | 44%        | 34% |  |   |   |   |   |
| • Engage in efforts to prepare patients to be active participants in HCV care                                                       | <b>63%</b> | 57%        | 50%        | 43%        | 34% |  | P | Δ | D | L |
| • Intervene with patients/consumers to promote uptake and adherence to HCV treatment                                                | 71%        | 79%        | 68%        | 60%        | 50% |  | P | Δ |   |   |
| • Use mass media to reach large numbers of people                                                                                   | 18%        | 36%        | 56%        | 34%        | 12% |  |   | Δ |   |   |
| • Promote demand for HCV care among patients through any other means                                                                | <b>40%</b> | 52%        | 59%        | <b>42%</b> | 31% |  |   | Δ |   |   |

1 **Bold italicized** denotes  $p < .05$  for association between strategy and HCV treatment volume (rho

2 range=.19-.41)

3 P = Most popular strategies across active implementation years (n=14)

4 Δ = Strategy use changed over time (n=21)

5 E = Strategy has dose effect on HCV treatment volume (n=11)

6 D = Strategy differed in use by Treatment Diffusion group in at least one of the four implementation years

7 (n=18)

1 H = Core HIT Strategies (n=11)  
2 L = Local Core Strategies (n=11)

3

4

5

6

7

8

9

10

11

12

13

14

15

16

17

18

19

20

21

22

23

24

25

26

27

28

1 **Appendix 2. Implementation Strategies Associated with Treatment Diffusion in**  
 2 **Specific Patterns**

| <b>Strategy</b>                                                              | <b>FY15</b> | <b>FY16</b> | <b>FY17</b> | <b>FY18</b> | <b>FY19</b> |
|------------------------------------------------------------------------------|-------------|-------------|-------------|-------------|-------------|
| Change physical structure and equipment                                      |             |             |             |             |             |
| <i>Innovator</i>                                                             | 63%         | 26%         | 39%         | <b>71%</b>  | 7%          |
| <i>Majority</i>                                                              | 48%         | <b>64%</b>  | 53%         | 50%         | 38%         |
| <i>Laggard</i>                                                               | 55%         | 38%         | <b>81%</b>  | 60%         | 36%         |
| Mandate changes to HCV care                                                  |             |             |             |             |             |
| <i>Innovator</i>                                                             | <b>53%</b>  | 52%         | 35%         | 38%         | 0%          |
| <i>Majority</i>                                                              | <b>58%</b>  | 53%         | 31%         | 25%         | 28%         |
| <i>Laggard</i>                                                               | 45%         | <b>50%</b>  | 50%         | 20%         | 36%         |
| Alter incentive/allowance structures                                         |             |             |             |             |             |
| <i>Innovator</i>                                                             | <b>16%</b>  | 9%          | 9%          | 0%          | 0%          |
| <i>Majority</i>                                                              | 0%          | 8%          | <b>10%</b>  | 8%          | 9%          |
| <i>Laggard</i>                                                               | 9%          | <b>19%</b>  | 6%          | 0%          | 0%          |
| Place HCV medications on the formulary                                       |             |             |             |             |             |
| <i>Innovator</i>                                                             | 68%         | <b>83%</b>  | 61%         | 43%         | 7%          |
| <i>Majority</i>                                                              | <b>64%</b>  | 64%         | 64%         | 44%         | 28%         |
| <i>Laggard</i>                                                               | <b>100%</b> | 69%         | 50%         | 53%         | 55%         |
| Create new clinical teams                                                    |             |             |             |             |             |
| <i>Innovator</i>                                                             | 58%         | <b>61%</b>  | 57%         | 33%         | 7%          |
| <i>Majority</i>                                                              | <b>44%</b>  | 47%         | 30%         | 38%         | 28%         |
| <i>Laggard</i>                                                               | 36%         | 44%         | <b>56%</b>  | 33%         | 18%         |
| Revise professional roles                                                    |             |             |             |             |             |
| <i>Innovator</i>                                                             | <b>68%</b>  | 57%         | 26%         | 14%         | 7%          |
| <i>Majority</i>                                                              | 44%         | <b>55%</b>  | 36%         | 35%         | 34%         |
| <i>Laggard</i>                                                               | 45%         | 56%         | <b>69%</b>  | 20%         | 45%         |
| Develop reminder systems for clinicians                                      |             |             |             |             |             |
| <i>Innovator</i>                                                             | 21%         | 30%         | 39%         | <b>43%</b>  | 13%         |
| <i>Majority</i>                                                              | 32%         | <b>48%</b>  | 33%         | 44%         | 44%         |
| <i>Laggard</i>                                                               | <b>64%</b>  | 44%         | 31%         | 40%         | 9%          |
| Have someone from inside the clinic tasked with “local technical assistance” |             |             |             |             |             |
| <i>Innovator</i>                                                             | <b>26%</b>  | 13%         | 26%         | 14%         | 13%         |
| <i>Majority</i>                                                              | 14%         | <b>30%</b>  | 19%         | 25%         | 16%         |
| <i>Laggard</i>                                                               | 0%          | 19%         | <b>50%</b>  | 7%          | 0%          |
| Provide clinical supervision                                                 |             |             |             |             |             |
| <i>Innovator</i>                                                             | <b>47%</b>  | 30%         | 39%         | 14%         | 20%         |
| <i>Majority</i>                                                              | 44%         | <b>53%</b>  | 36%         | 42%         | 34%         |
| <i>Laggard</i>                                                               | 36%         | <b>50%</b>  | 25%         | 20%         | 18%         |
| Use data warehousing techniques                                              |             |             |             |             |             |
| <i>Innovator</i>                                                             | <b>89%</b>  | 78%         | 87%         | 86%         | 80%         |
| <i>Majority</i>                                                              | 84%         | <b>95%</b>  | 93%         | 88%         | 81%         |

|                                                                              |            |            |            |     |     |
|------------------------------------------------------------------------------|------------|------------|------------|-----|-----|
| <i>Laggard</i>                                                               | 82%        | 94%        | <b>94%</b> | 80% | 82% |
| Tailor strategies to deliver HCV care                                        |            |            |            |     |     |
| <i>Innovator</i>                                                             | 68%        | 74%        | <b>87%</b> | 81% | 53% |
| <i>Majority</i>                                                              | 56%        | <b>86%</b> | 67%        | 65% | 84% |
| <i>Laggard</i>                                                               | <b>82%</b> | 69%        | 81%        | 73% | 45% |
| Train designated clinicians to train others                                  |            |            |            |     |     |
| <i>Innovator</i>                                                             | 21%        | 17%        | <b>22%</b> | 14% | 7%  |
| <i>Majority</i>                                                              | 22%        | <b>33%</b> | 29%        | 25% | 25% |
| <i>Laggard</i>                                                               | 9%         | 6%         | <b>19%</b> | 13% | 9%  |
| Build a local coalition/team to address challenges                           |            |            |            |     |     |
| <i>Innovator</i>                                                             | 53%        | <b>65%</b> | 30%        | 33% | 13% |
| <i>Majority</i>                                                              | <b>54%</b> | 53%        | 31%        | 31% | 31% |
| <i>Laggard</i>                                                               | 45%        | 38%        | <b>75%</b> | 7%  | 27% |
| Identify and prepare champions                                               |            |            |            |     |     |
| <i>Innovator</i>                                                             | <b>58%</b> | 39%        | 35%        | 43% | 47% |
| <i>Majority</i>                                                              | 52%        | <b>58%</b> | 49%        | 38% | 38% |
| <i>Laggard</i>                                                               | 27%        | 50%        | <b>75%</b> | 40% | 27% |
| Start with small pilot studies and then scale them up                        |            |            |            |     |     |
| <i>Innovator</i>                                                             | 21%        | 9%         | <b>22%</b> | 14% | 7%  |
| <i>Majority</i>                                                              | 24%        | <b>26%</b> | 23%        | 19% | 9%  |
| <i>Laggard</i>                                                               | 18%        | <b>44%</b> | 25%        | 13% | 18% |
| Conduct small tests of change, measure outcomes, and then refine these tests |            |            |            |     |     |
| <i>Innovator</i>                                                             | <b>21%</b> | 13%        | 13%        | 14% | 7%  |
| <i>Majority</i>                                                              | 20%        | 21%        | <b>26%</b> | 19% | 13% |
| <i>Laggard</i>                                                               | 9%         | 31%        | <b>50%</b> | 20% | 9%  |
| Develop and use tools for quality monitoring                                 |            |            |            |     |     |
| <i>Innovator</i>                                                             | <b>42%</b> | 17%        | 30%        | 14% | 7%  |
| <i>Majority</i>                                                              | <b>42%</b> | 38%        | 21%        | 21% | 25% |
| <i>Laggard</i>                                                               | 36%        | 31%        | <b>56%</b> | 33% | 0%  |
| Engage in efforts to prepare patients to be active participants in HCV care  |            |            |            |     |     |
| <i>Innovator</i>                                                             | <b>84%</b> | 52%        | 57%        | 38% | 33% |
| <i>Majority</i>                                                              | 52%        | <b>59%</b> | 46%        | 44% | 38% |
| <i>Laggard</i>                                                               | <b>73%</b> | 56%        | 56%        | 47% | 27% |

1 **Bold** denotes highest use of the strategy per diffusion group

2

3

4
